# Supplementary material for: Highly-tunable ferromagnetism in Cr-doped layered van der Waals NiTe2 crystals with high air stability
Source: Royal Society of Chemistry journal article supplement (doi:10.1039/d2ce00734g), 2022-01-01
Supplement: d2ce00734g1.pdf [file d2ce00734g1.pdf]

## Supporting Information

### **Highly-Tunable Ferromagnetism in Cr-Doped Layered van der Waals NiTe<sub>2</sub> Crystal with High Air Stability**

Boyuan Di<sup>a,b</sup>, Pengzhen Zhang<sup>a,b</sup>, Hongfei Yin<sup>a,b</sup>, Peng Han<sup>a,b</sup>, Hao Wu<sup>a,b</sup>, Gaojie Zhang<sup>a,b</sup>, Wen Jin<sup>a,b</sup>, Xiaokun Wen<sup>a,b</sup>, Wenfeng Zhang<sup>a,b</sup>, and Haixin Chang<sup>a,b\*</sup>

<sup>a</sup>Institute for Quantum Science and Engineering Huazhong University of Science and Technology Wuhan 430074, China.

<sup>b</sup>Center for Joining and Electronic Packaging State Key Laboratory of Material Processing and Die & Mold Technology School of Materials Science and Engineering Huazhong University of Science and Technology Wuhan 430074, China.

\*E-mail: hxchang@hust.edu.cn

**Table S1.** EDX results for different areas of freshly exfoliated 1# and 2# samples

| Sample | Selection area | Cr (At%)   | Ni (At%)    | Te (At%)    |
|--------|----------------|------------|-------------|-------------|
| 1#     | 1              | 1.77       | 33.67       | 64.55       |
|        | 2              | 1.88       | 33.73       | 64.39       |
|        | 3              | 1.96       | 33.80       | 64.24       |
|        | average        | 1.87±0.095 | 33.73±0.065 | 64.40±0.155 |
| 2#     | 1              | 2.14       | 33.60       | 64.26       |
|        | 2              | 2.14       | 33.77       | 64.09       |
|        | 3              | 2.15       | 33.11       | 64.74       |
|        | average        | 2.14±0.058 | 33.50±0.342 | 64.36±0.337 |

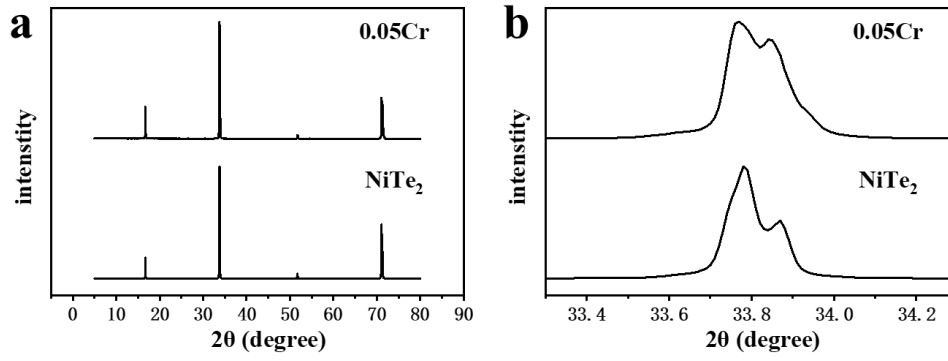

**Fig S1** Structural characterization of the NiTe<sub>2</sub> and 0.05Cr crystal, represent the Cr molar ratio in precursor ( $n(\text{Cr})/n(\text{Cr})+n(\text{Ni})$ ) is 0.05. (a)XRD patterns of as exfoliated single crystals. (b) Amplified view of (002) peak.

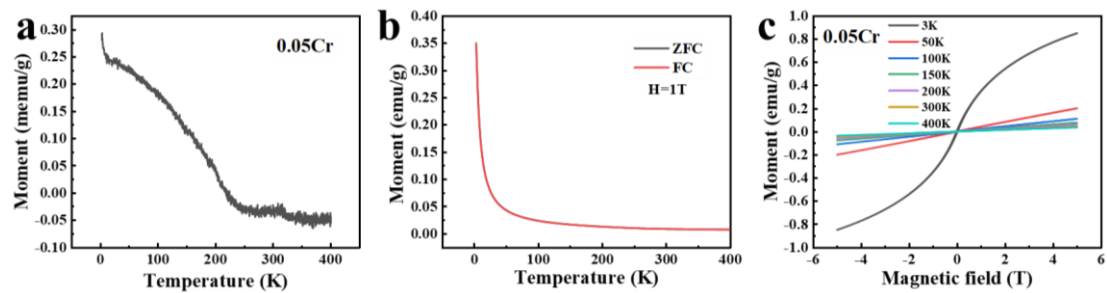

**Fig S2** Magnetic properties of 0.05Cr single crystals. (a) Spontaneous magnetization ( $B = 0$ ) curves (b) ZFC-FC curves with 1 T external applied magnetic field. (c) magnetization curves (M-H) with external applied magnetic field range of -5 T to 5 T from 3 K to 300 K.
